# Supplementary material for: Synthesis, Crystal Structure, Hirshfeld Surfaces Analysis, Interaction with DNA and Comparation of Different Bases in Hirshfeld Atom Refinement of New Polymorph of Chlorido(η6-p-cymene)(diclofenac)Ruthenium(II) Organometallic Compound
Source: MDPI journal article supplement (doi:10.3390/inorganics11050190), 2023-04-27
Supplement: s1 [file s1]

**Synthesis, crystal structure, Hirshfeld surfaces analysis, interaction with DNA and comparison of different bases in Hirshfeld Atom Refinement (HAR) of new polymorph of chlorido( $\eta^6$ -p-cymene)(diclofenac)ruthenium(II) organometallic compound.**

**Martin Schoeller <sup>1\*</sup>, Milan Piroš <sup>1</sup>, Karol Lušpai <sup>3</sup>, Jana Braniša <sup>2</sup> and Ján Moncol <sup>1,2\*</sup>**

<sup>1</sup> Department of Inorganic Chemistry, Slovak University of Technology, Radlinského 9, 812 37 Bratislava, Slovakia

<sup>2</sup> Department of Chemistry, Faculty of Natural Sciences, Constatine the Philosopher University in Nitra, 949 74 Nitra, Slovakia

<sup>3</sup> Department of Physical Chemistry, Slovak University of Technology, Radlinského 9, 812 37 Bratislava, Slovakia

**Supplementary material**

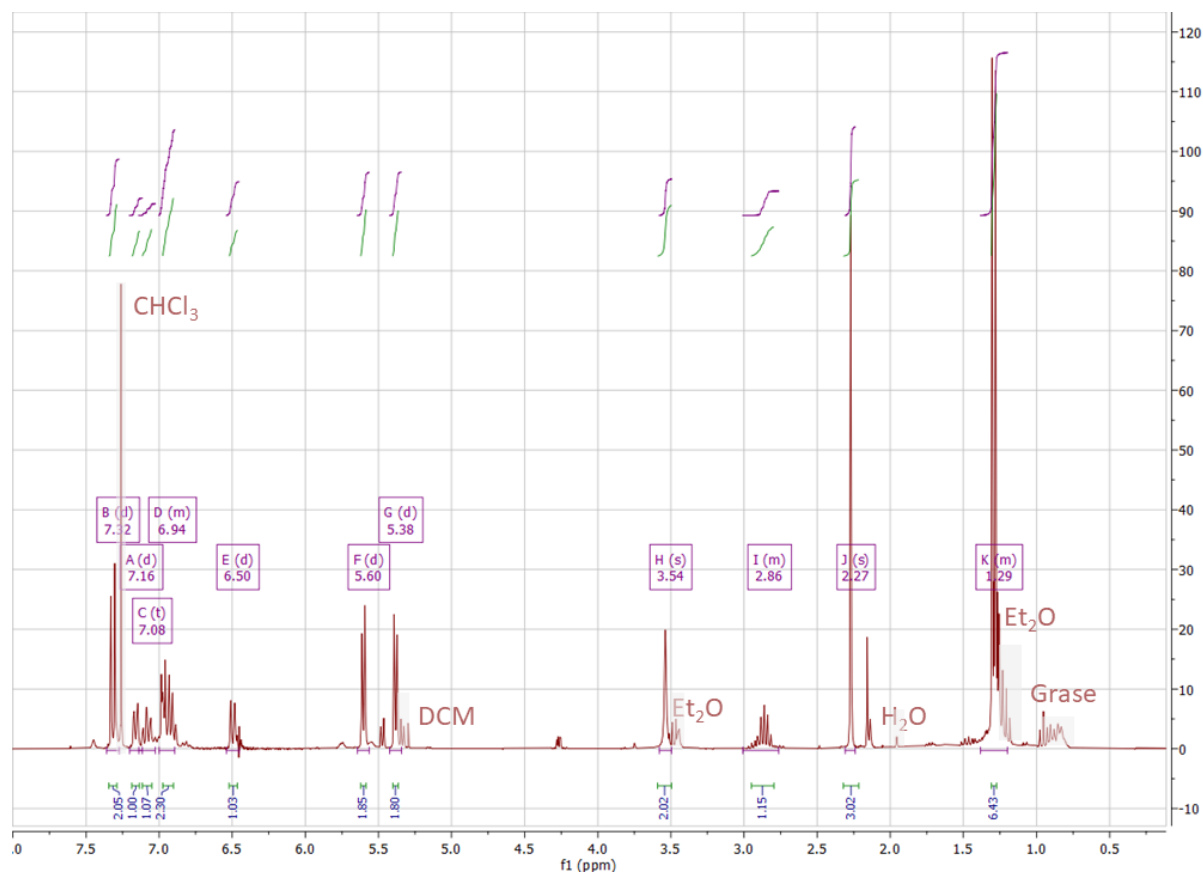

**Figure S1** The <sup>1</sup>H NMR spectrum of prepared complex

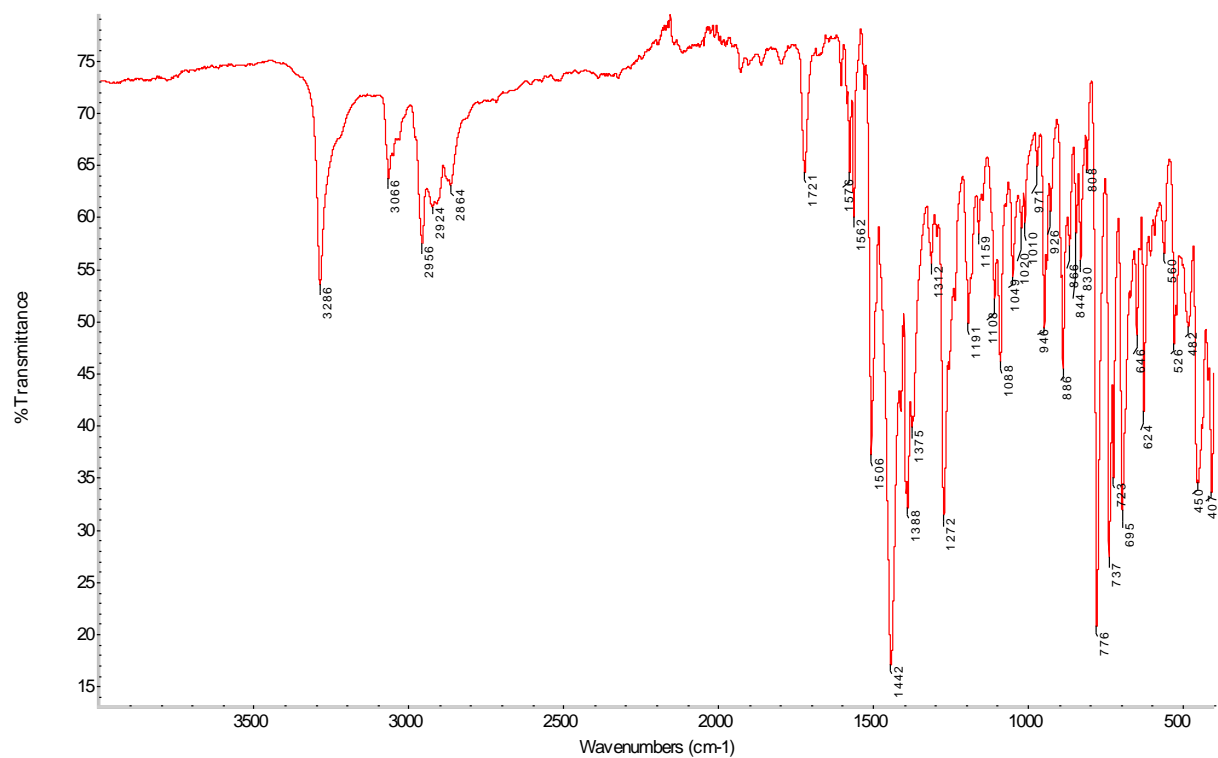

**Figure S2** The FTIR spectrum of prepared complex

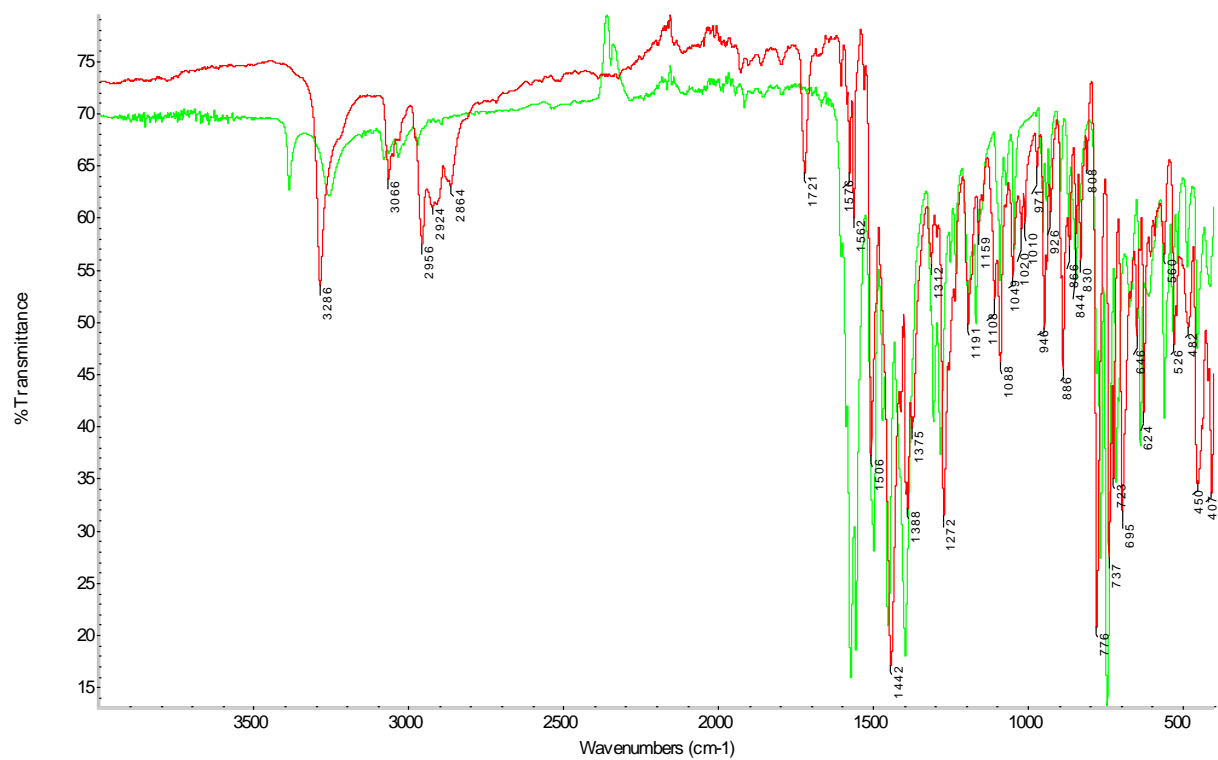

**Figure S3** Comparison of FTIR spectra of prepared complex and diclofenac sodium salt

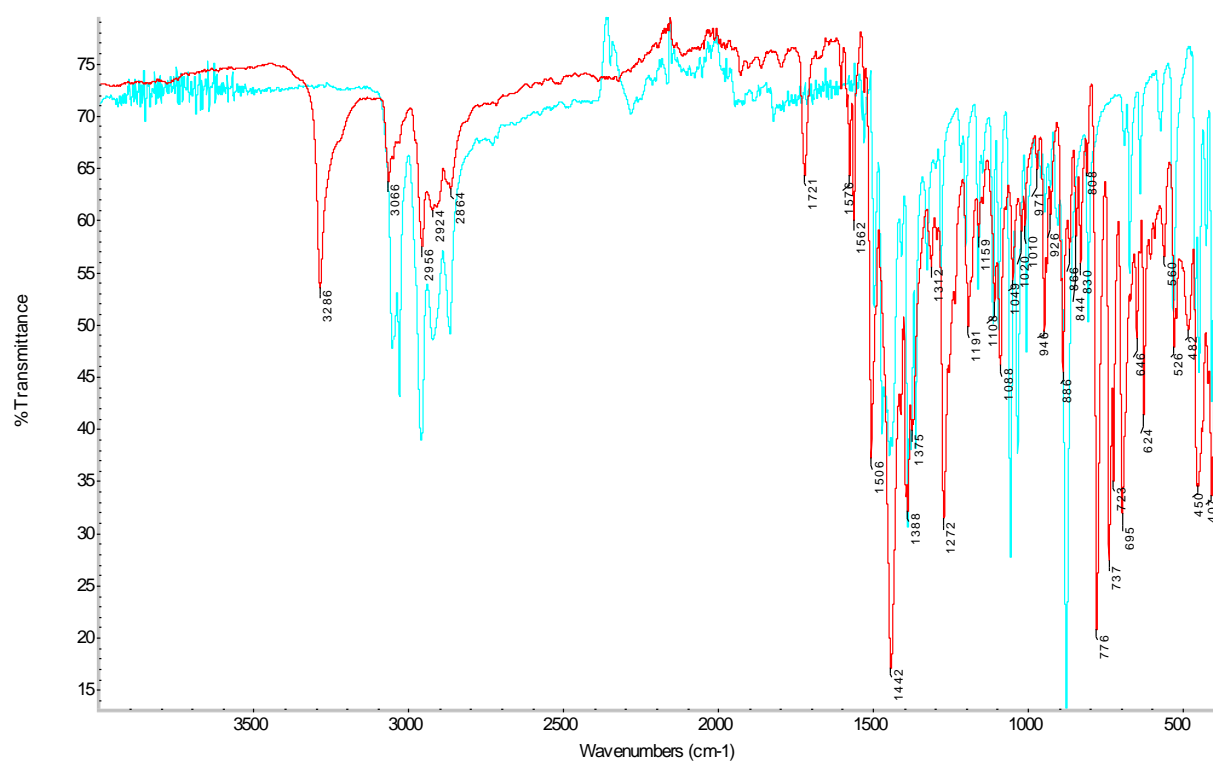

**Figure S4** Comparison of FTIR spectra of prepared complex and dimeric precursor

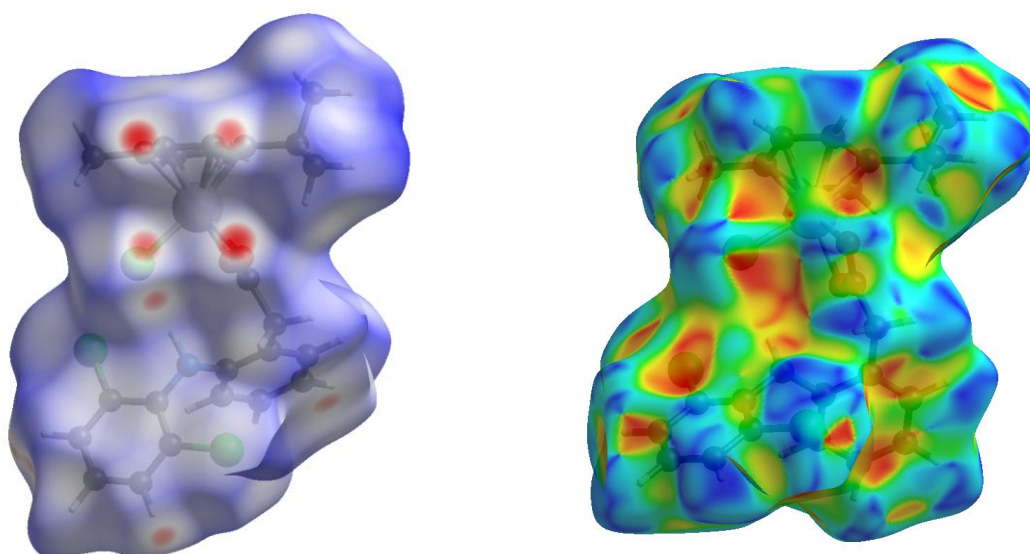

**Figure S5** Hirshfeld surface for HAR1 model of complex mapped over  $d_{\text{norm}}$  (left) and shape index (right)

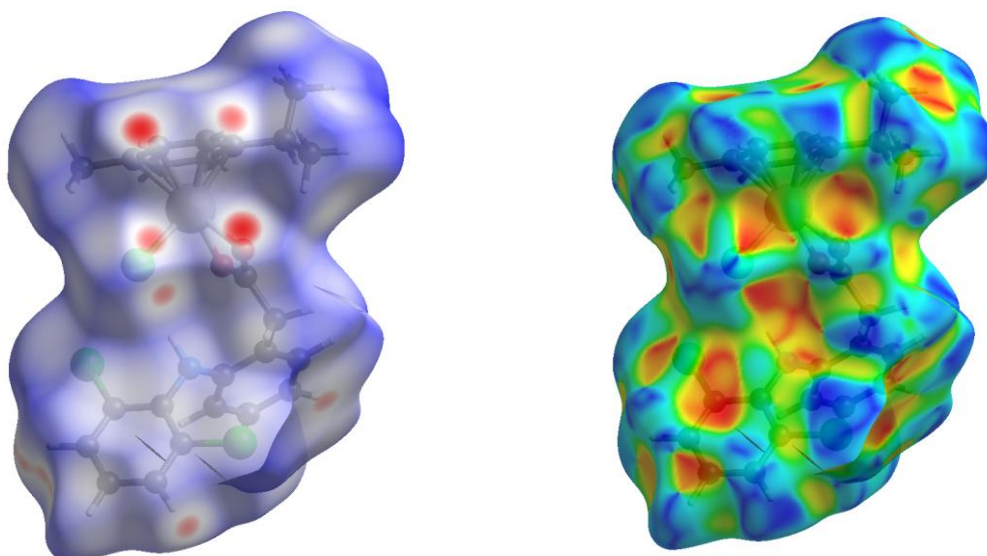

**Figure S6** Hirshfeld surface for HAR2 model of complex mapped over  $d_{\text{norm}}$  (left) and shape index (right)

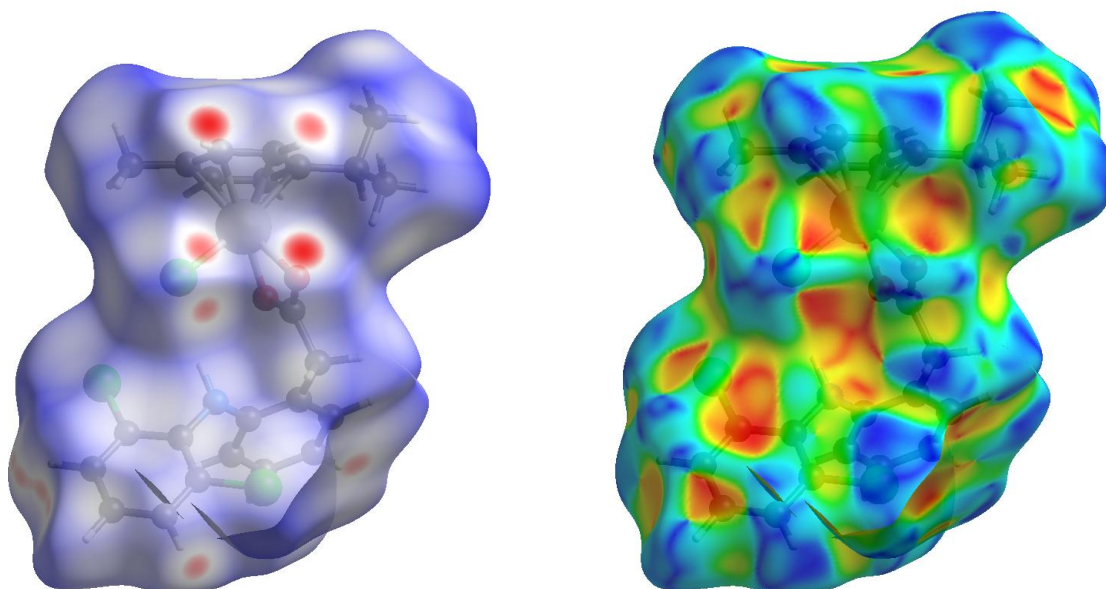

**Figure S7** Hirshfeld surface for HAR3 model of complex mapped over  $d_{\text{norm}}$  (left) and shape index (right)

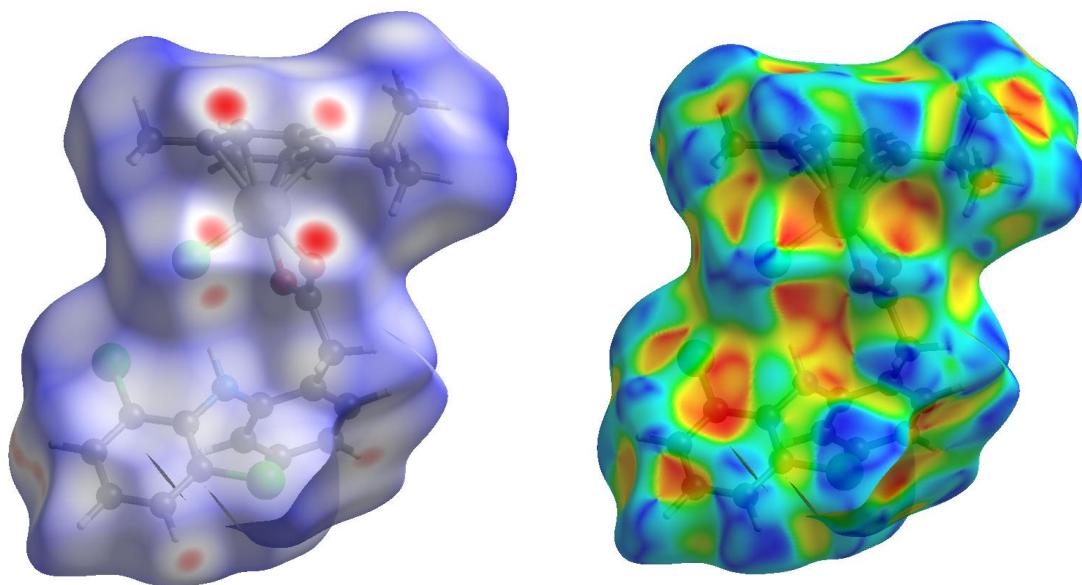

**Figure S8** Hirshfeld surface for HAR4 model of complex mapped over  $d_{\text{norm}}$  (left) and shape index (right)

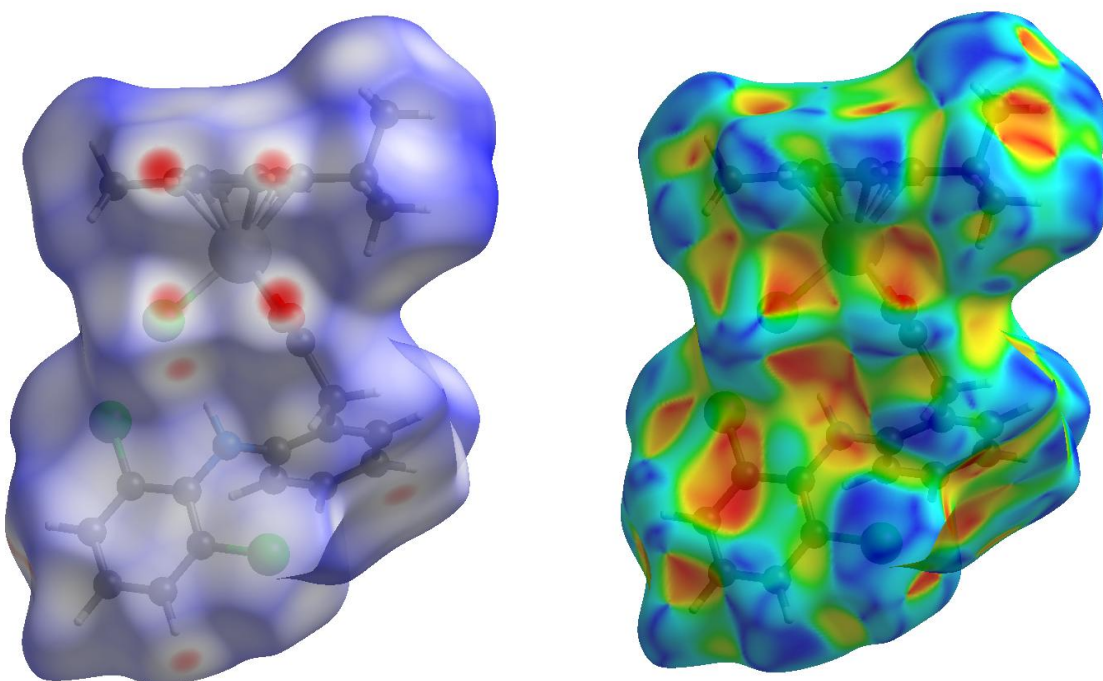

**Figure S9** Hirshfeld surface for HAR5 model of complex mapped over  $d_{\text{norm}}$  (left) and shape index (right)



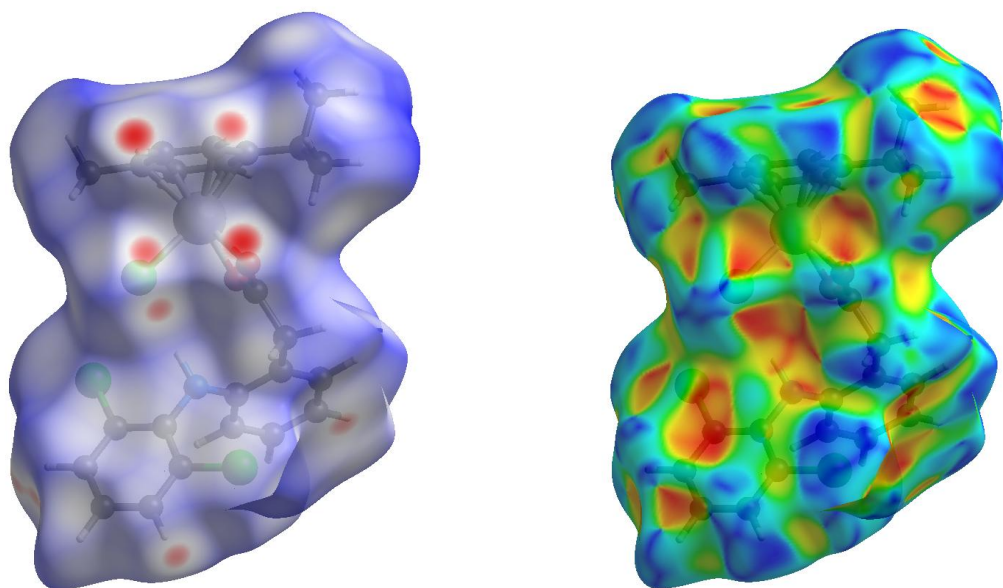

**Figure S10** Hirshfeld surface for HAR6 model of complex mapped over  $d_{\text{norm}}$  (left) and shape index (right)

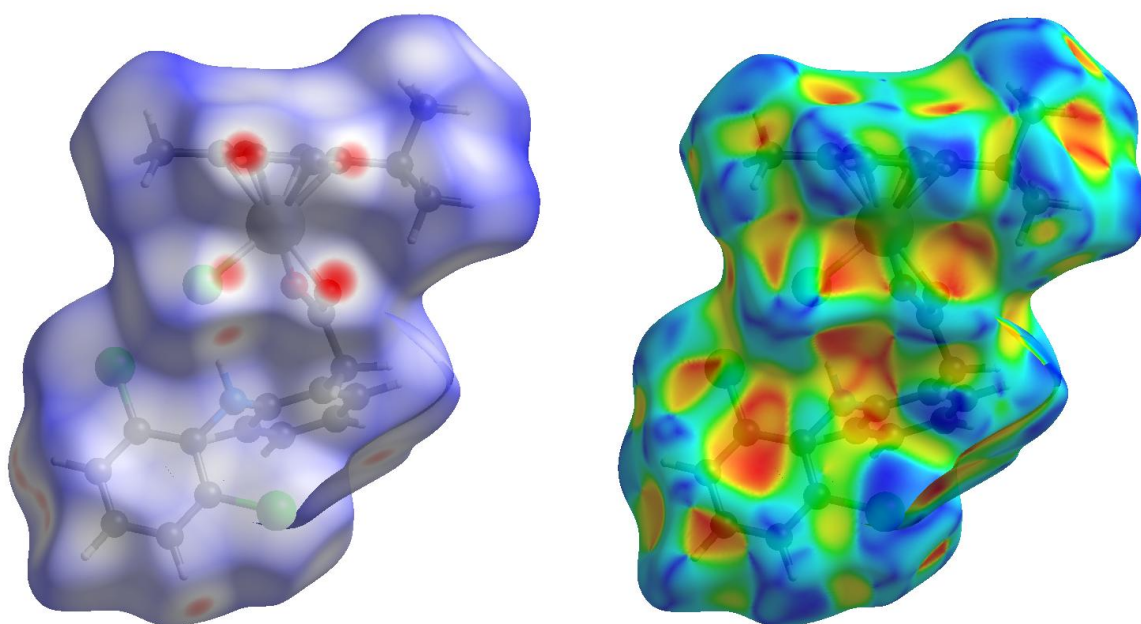

**Figure S11** Hirshfeld surface for HAR7 model of complex mapped over  $d_{\text{norm}}$  (left) and shape index (right)

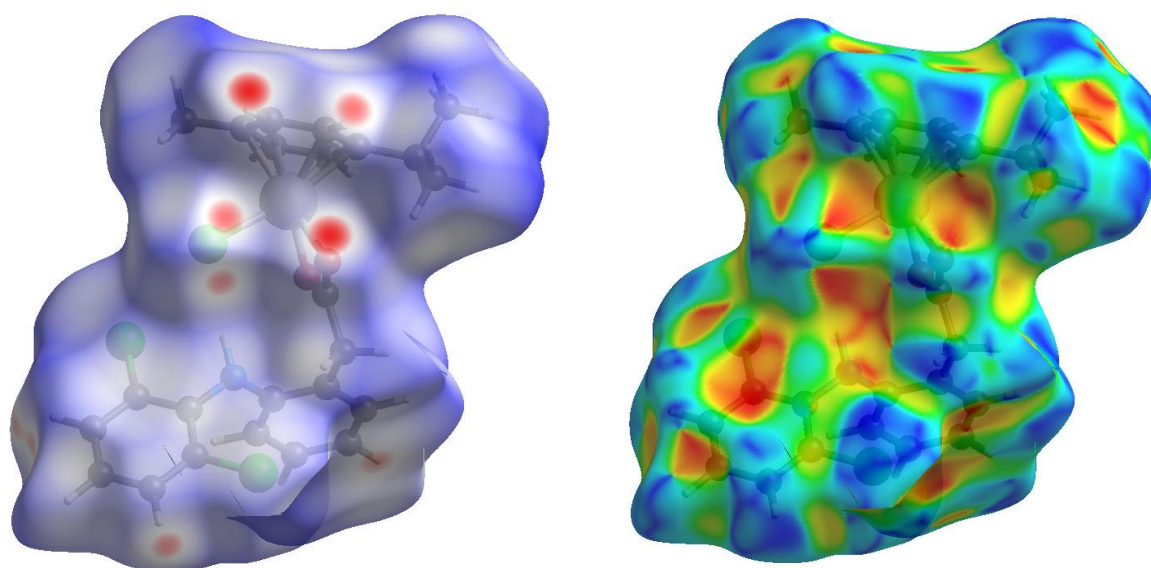

**Figure S12** Hirshfeld surface for HAR8 model of complex mapped over  $d_{\text{norm}}$  (left) and shape index (right)

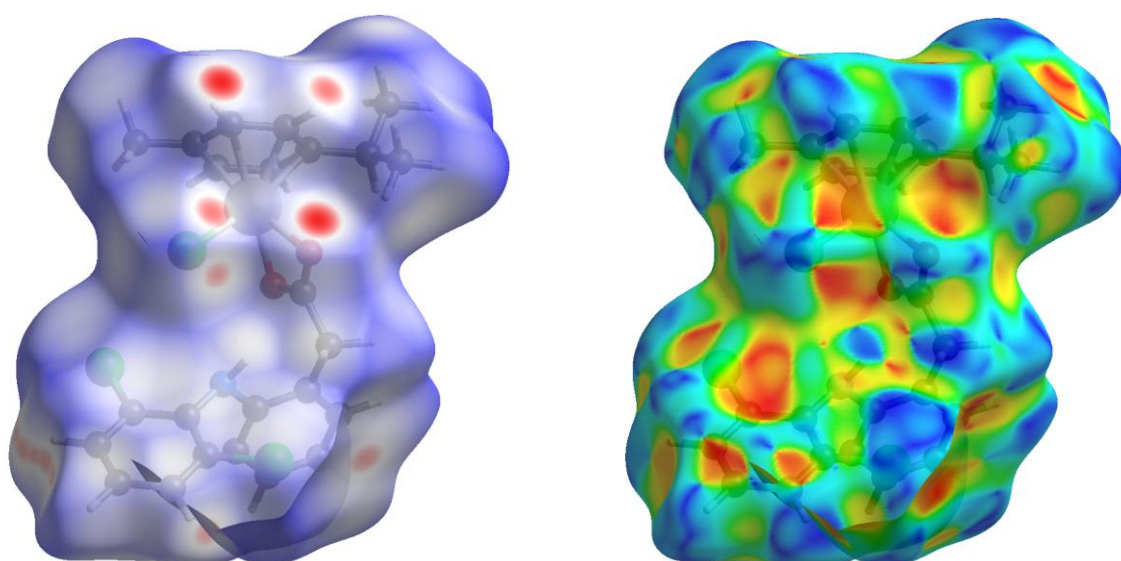

**Figure S13** Hirshfeld surface for prepared complex with non-HAR (IAM) model of complex mapped over  $d_{\text{norm}}$  (left) and shape index (right)

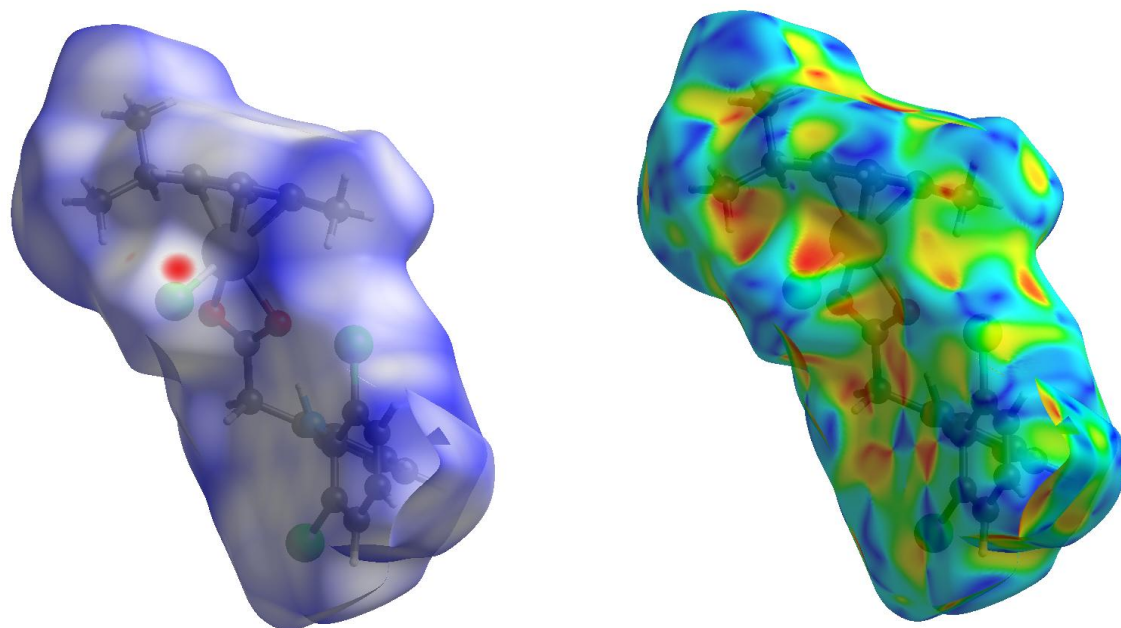

**Figure S14** Hirshfeld surface for orthorhombic polymorph of complex mapped over  $d_{\text{norm}}$  (left) and shape index (right) [35]



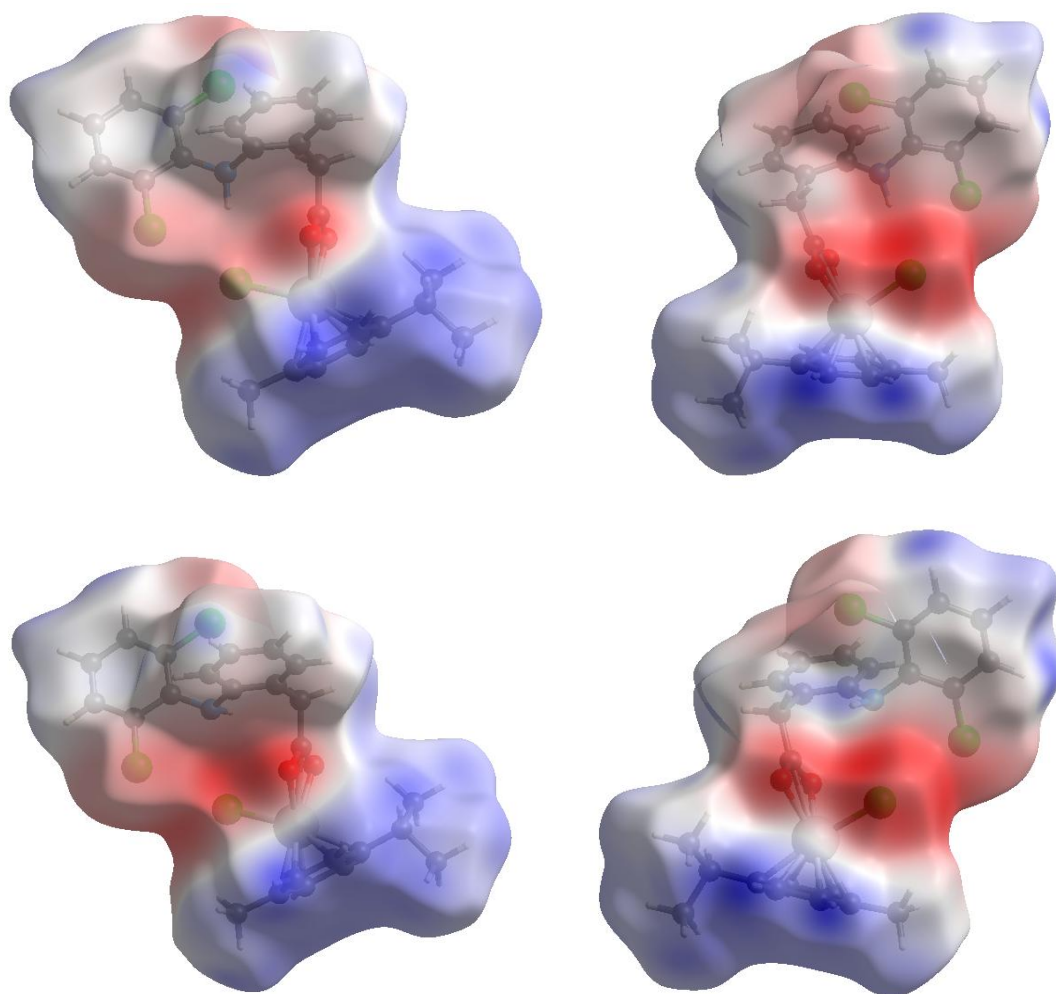

**Figure S15** Hirshfeld surface mapped over the electrostatic potential of 1 (top) and orthorhombic polymorph (bottom), with positive and negative potential indicated in blue and red, respectively.

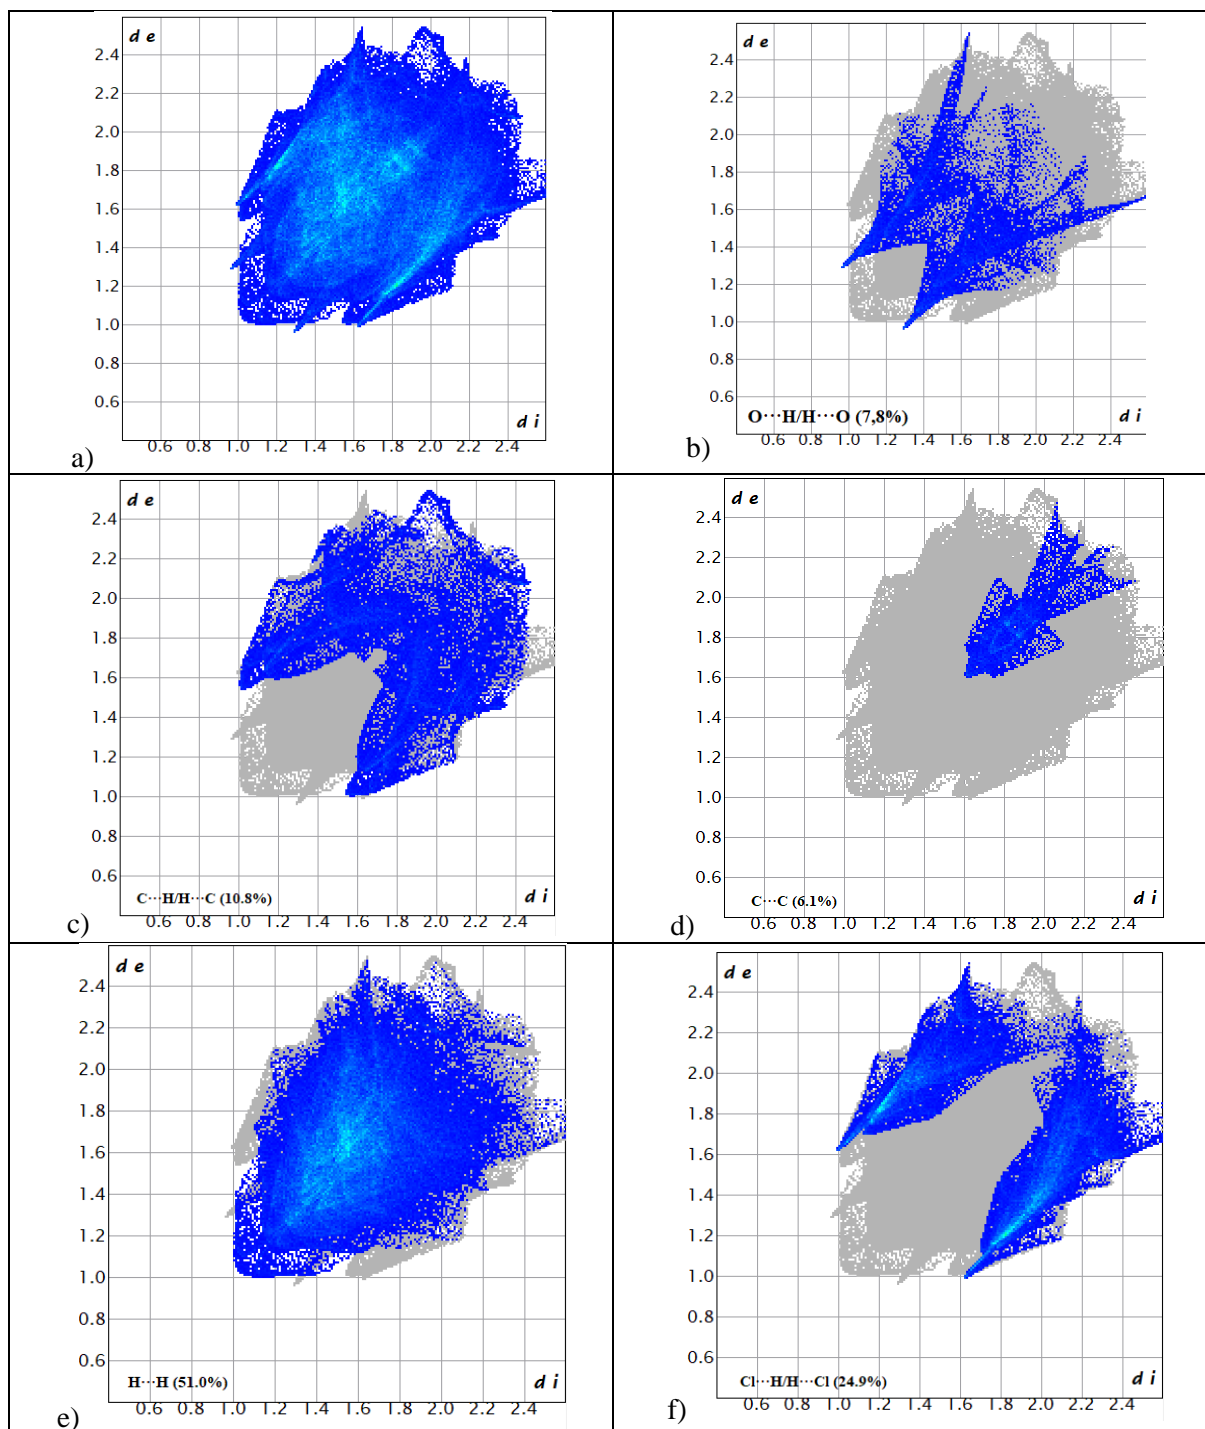

**Figure S16** The full two-dimensional fingerprint plots of prepared complex (IAM model), showing a) all interactions, b)  $O \cdots H/H \cdots O$ , c)  $C \cdots H/H \cdots C$ , d)  $C \cdots C$ , e)  $H \cdots H$ , and f)  $Cl \cdots H/H \cdots Cl$  close contacts.

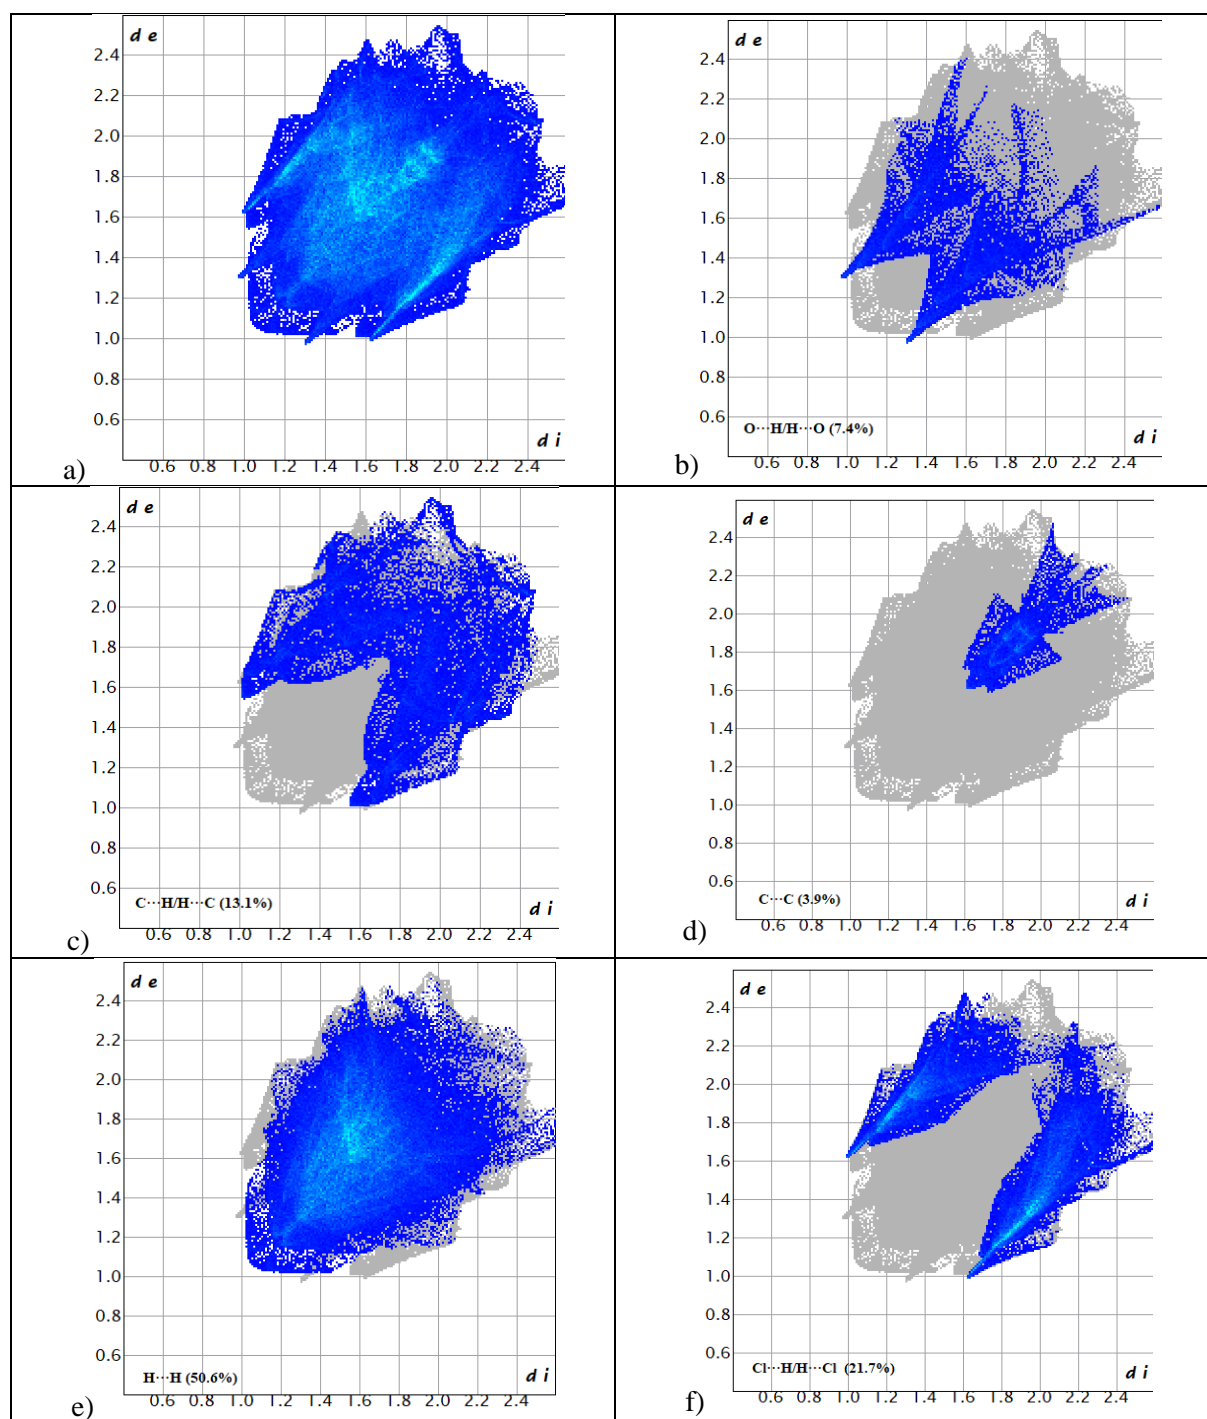

**Figure S17** The full two-dimensional fingerprint plots of HAR1 model of prepared complex, showing a) all interactions, b)  $O \cdots H/H \cdots O$ , c)  $C \cdots H/H \cdots C$ , d)  $C \cdots C$ , e)  $H \cdots H$ , and f)  $Cl \cdots H/H \cdots Cl$  close contacts.

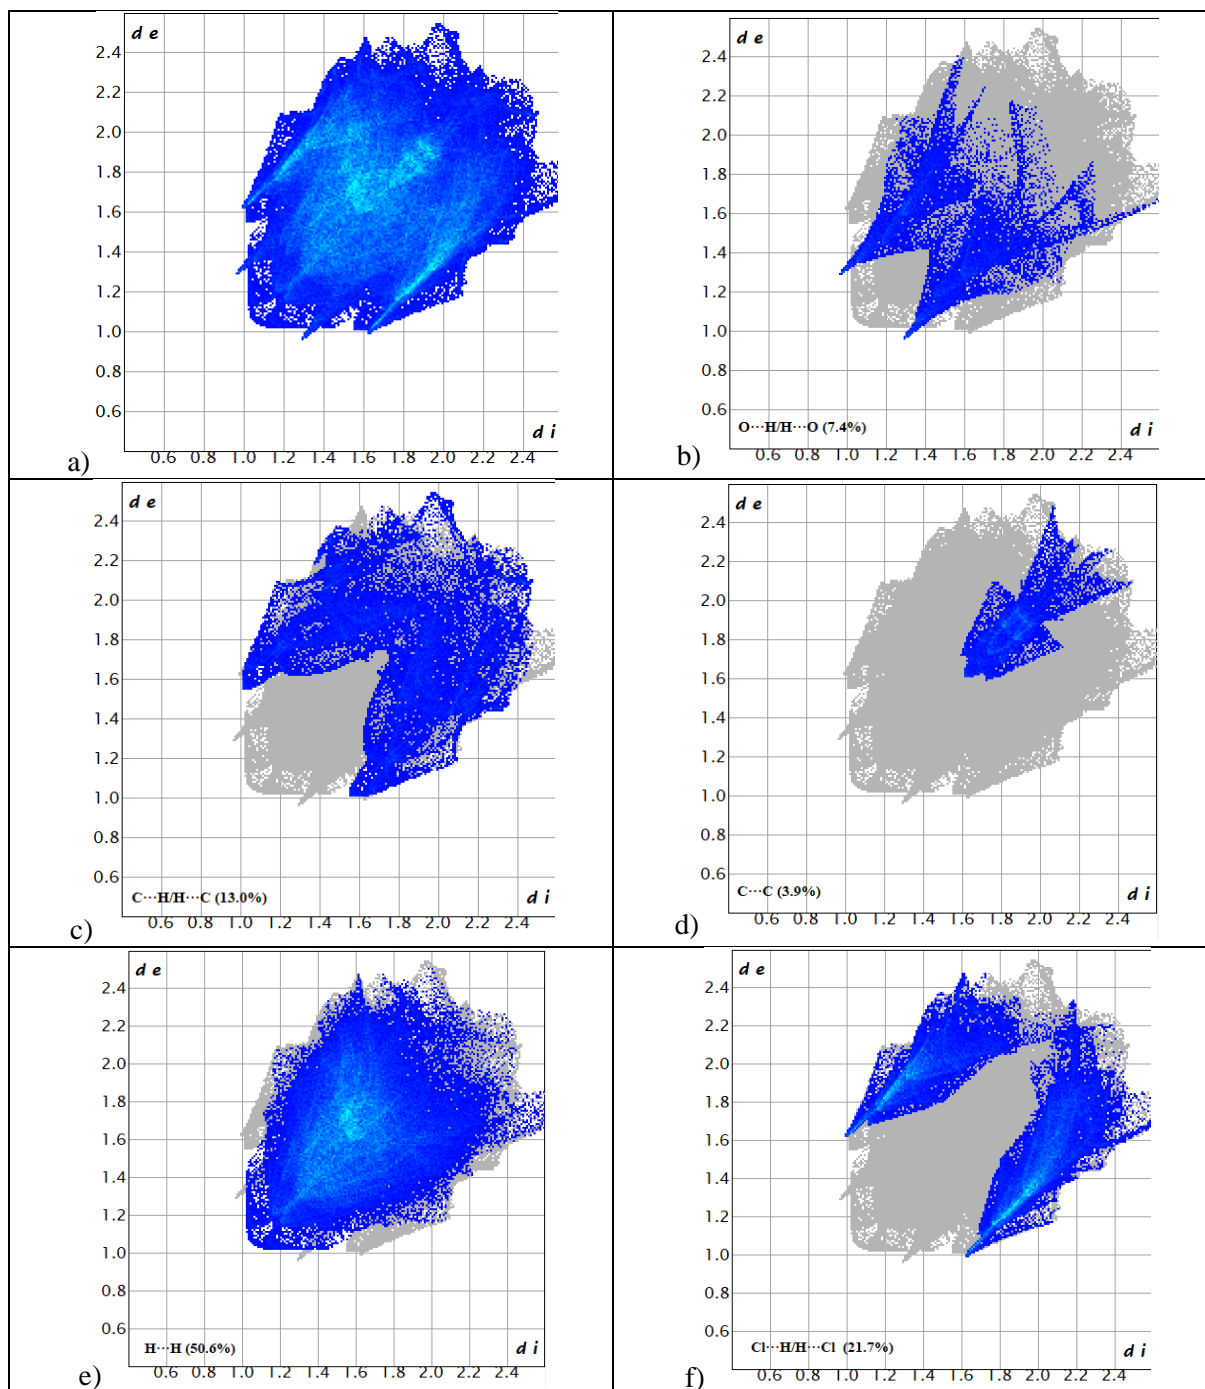

**Figure S18** The full two-dimensional fingerprint plots of HAR2 model of prepared complex, showing a) all interactions, b)  $\text{O}\cdots\text{H}/\text{H}\cdots\text{O}$ , c)  $\text{C}\cdots\text{H}/\text{H}\cdots\text{C}$ , d)  $\text{C}\cdots\text{C}$ , e)  $\text{H}\cdots\text{H}$ , and f)  $\text{Cl}\cdots\text{H}/\text{H}\cdots\text{Cl}$  close contacts.

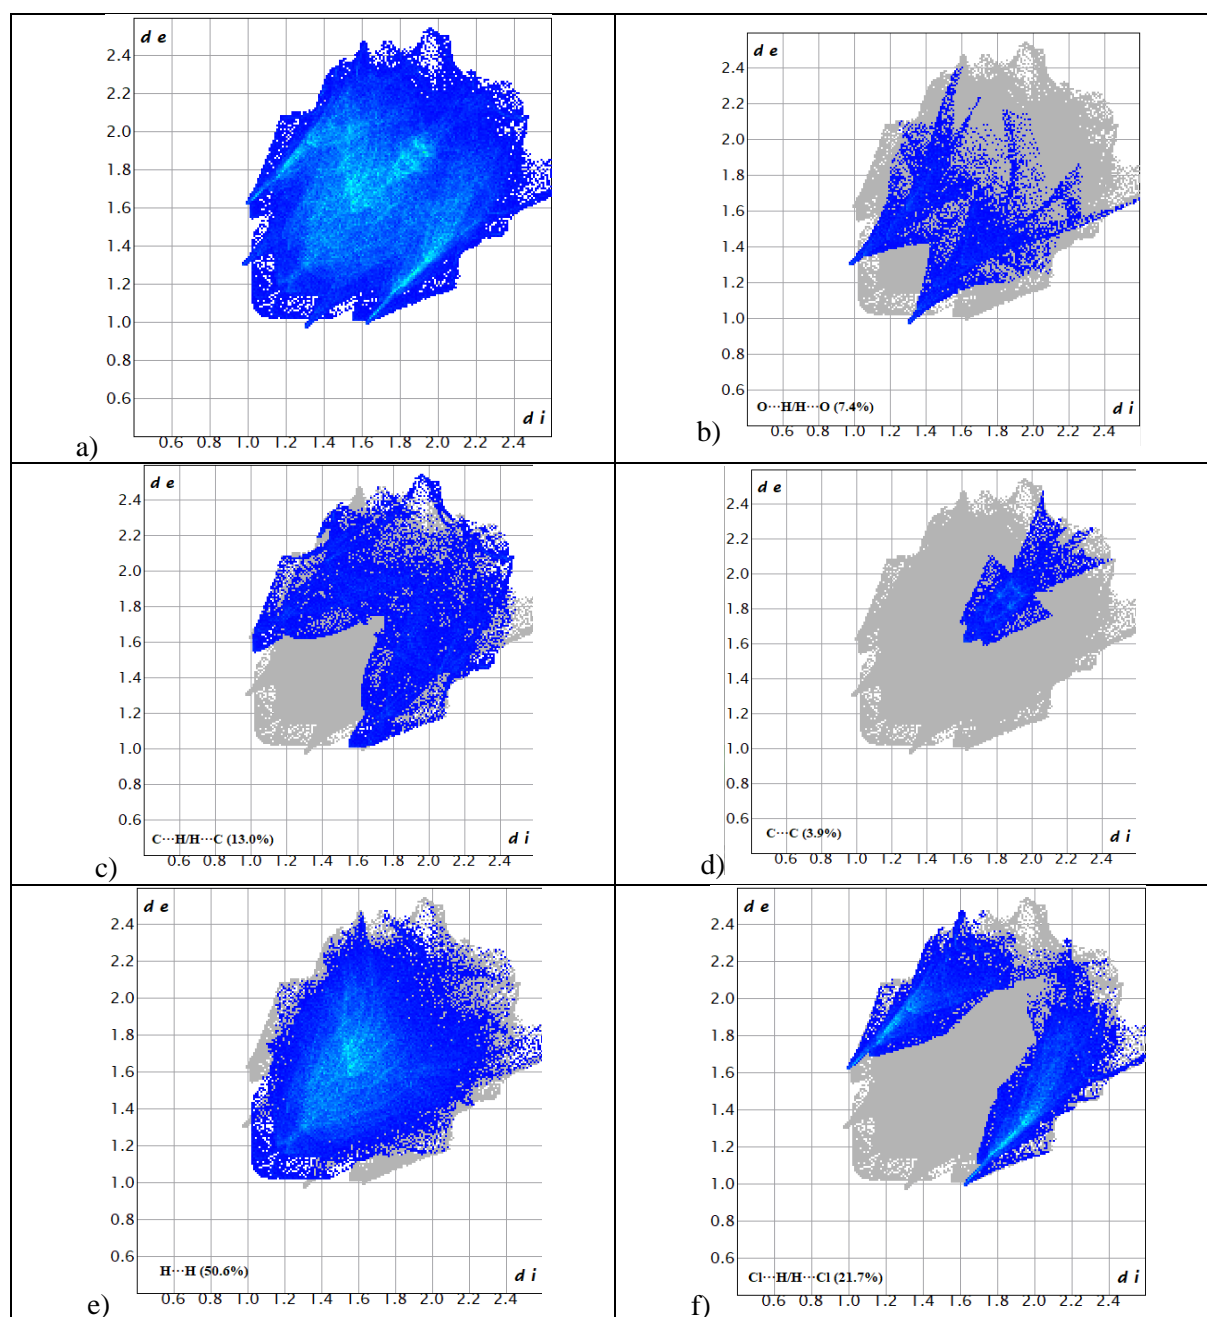

**Figure S19** The full two-dimensional fingerprint plots of HAR3 model of prepared complex, showing a) all interactions, b)  $O \cdots H/H \cdots O$ , c)  $C \cdots H/H \cdots C$ , d)  $C \cdots C$ , e)  $H \cdots H$ , and f)  $Cl \cdots H/H \cdots Cl$  close contacts.



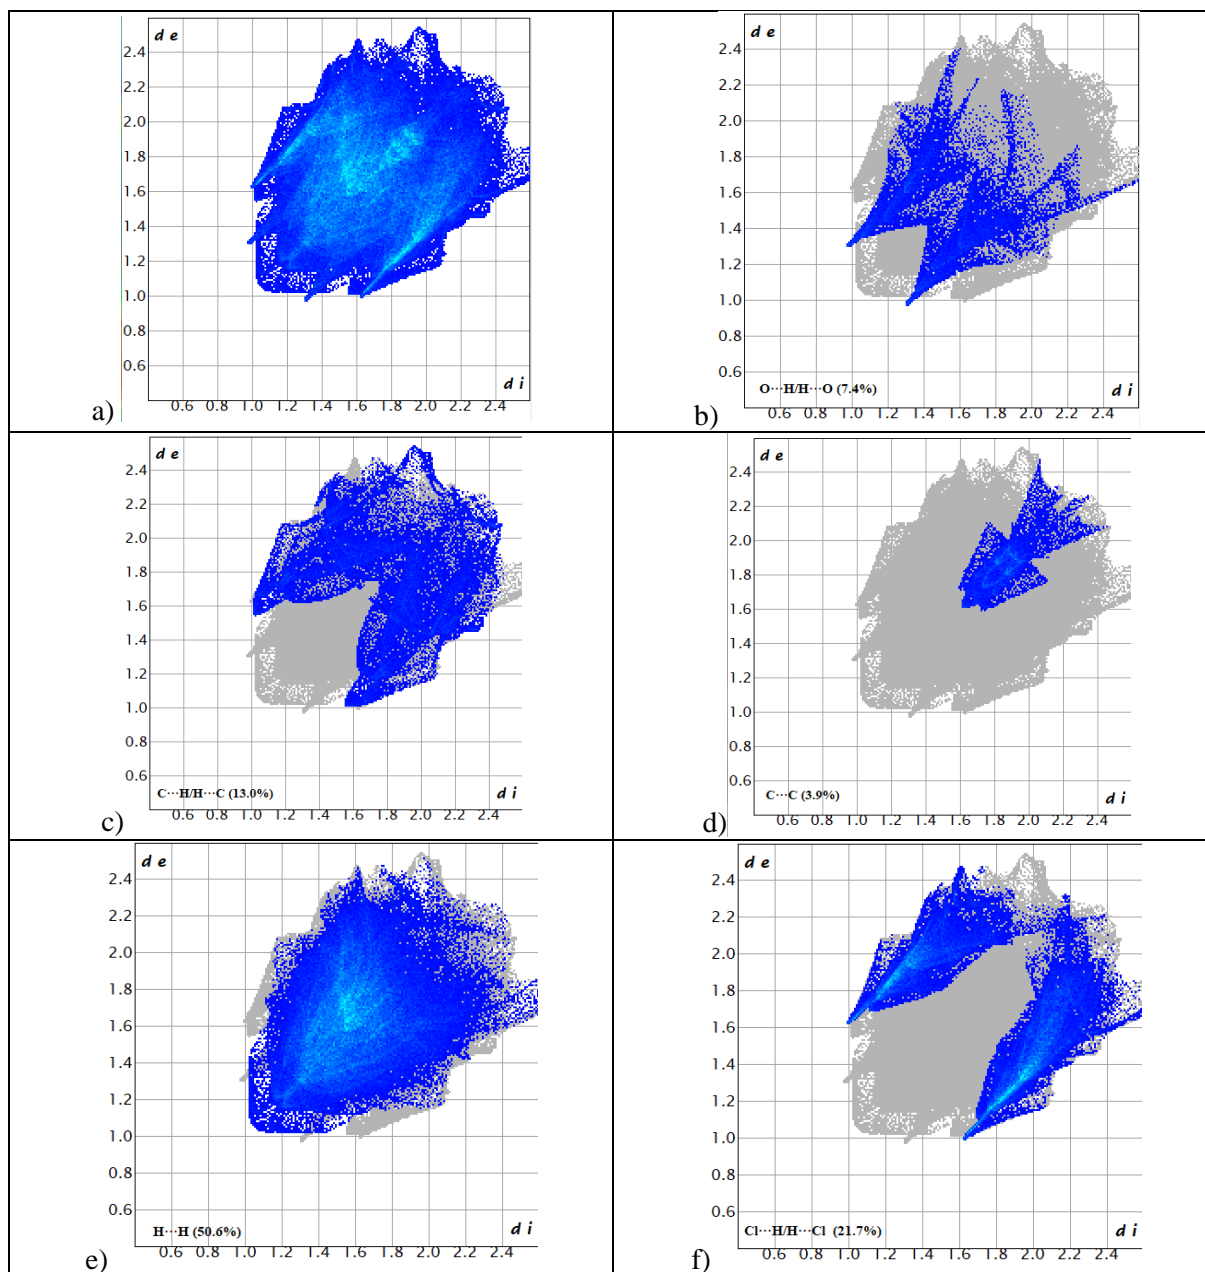

**Figure S20** The full two-dimensional fingerprint plots of HAR4 model of prepared complex, showing a) all interactions, b)  $O \cdots H/H \cdots O$ , c)  $C \cdots H/H \cdots C$ , d)  $C \cdots C$ , e)  $H \cdots H$ , and f)  $Cl \cdots H/H \cdots Cl$  close contacts.

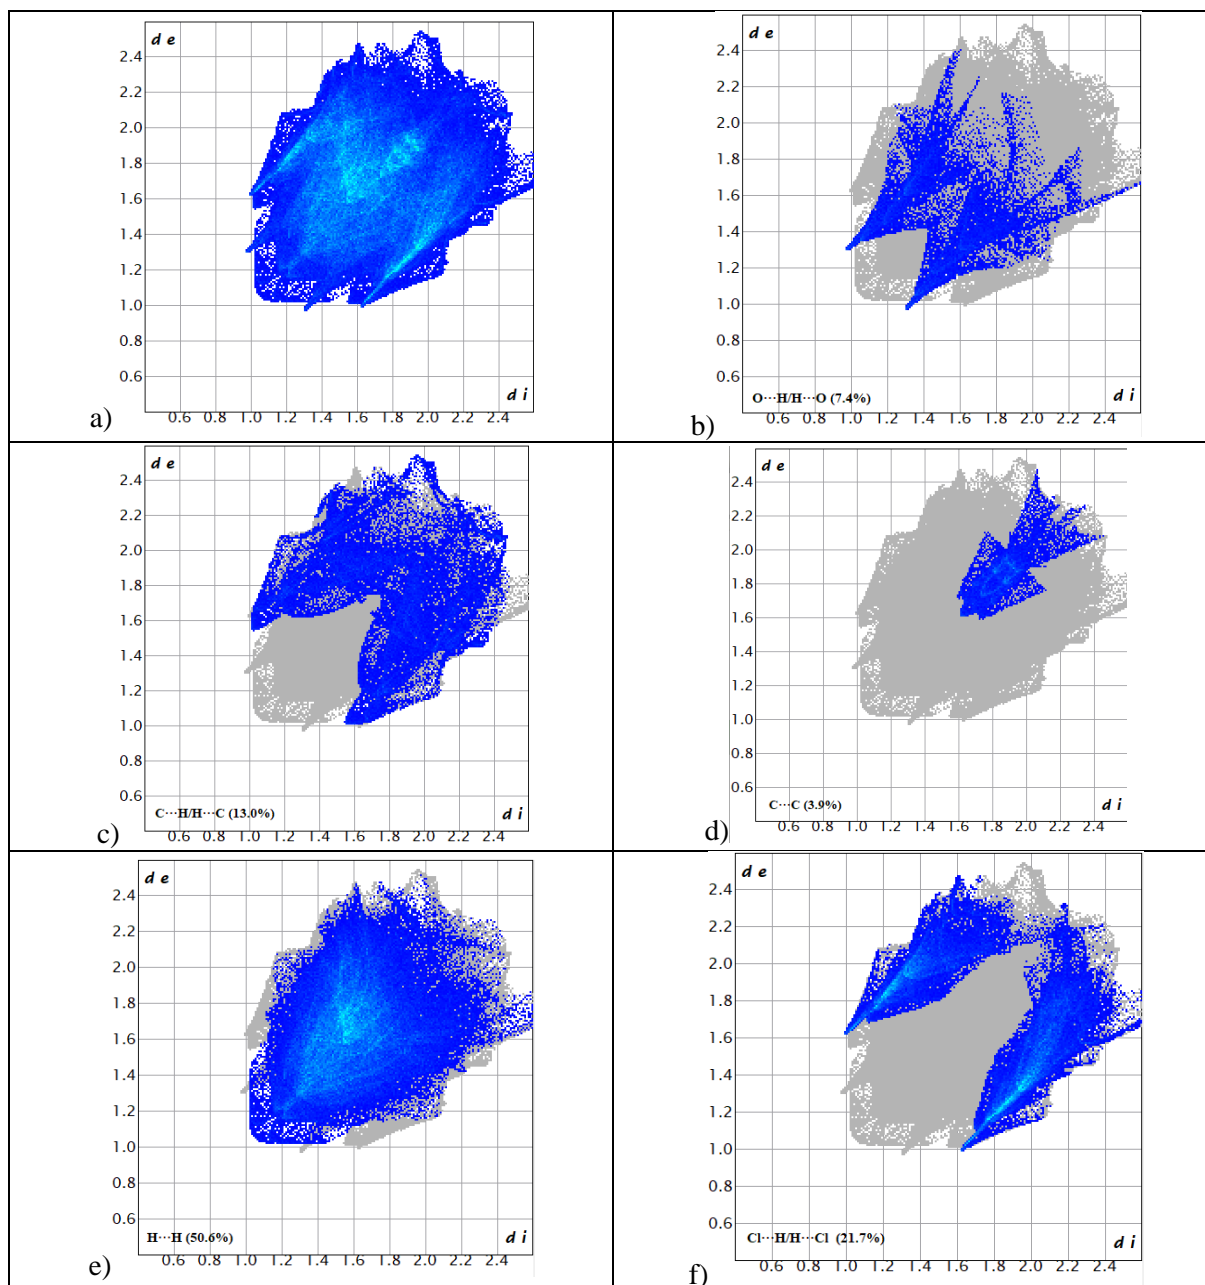

**Figure S21** The full two-dimensional fingerprint plots of HAR5 model of prepared complex, showing a) all interactions, b)  $O \cdots H/H \cdots O$ , c)  $C \cdots H/H \cdots C$ , d)  $C \cdots C$ , e)  $H \cdots H$ , and f)  $Cl \cdots H/H \cdots Cl$  close contacts.



**Figure S22** The full two-dimensional fingerprint plots of HAR6 model of prepared complex, showing a) all interactions, b)  $O \cdots H/H \cdots O$ , c)  $C \cdots H/H \cdots C$ , d)  $C \cdots C$ , e)  $H \cdots H$ , and f)  $Cl \cdots H/H \cdots Cl$  close contacts.

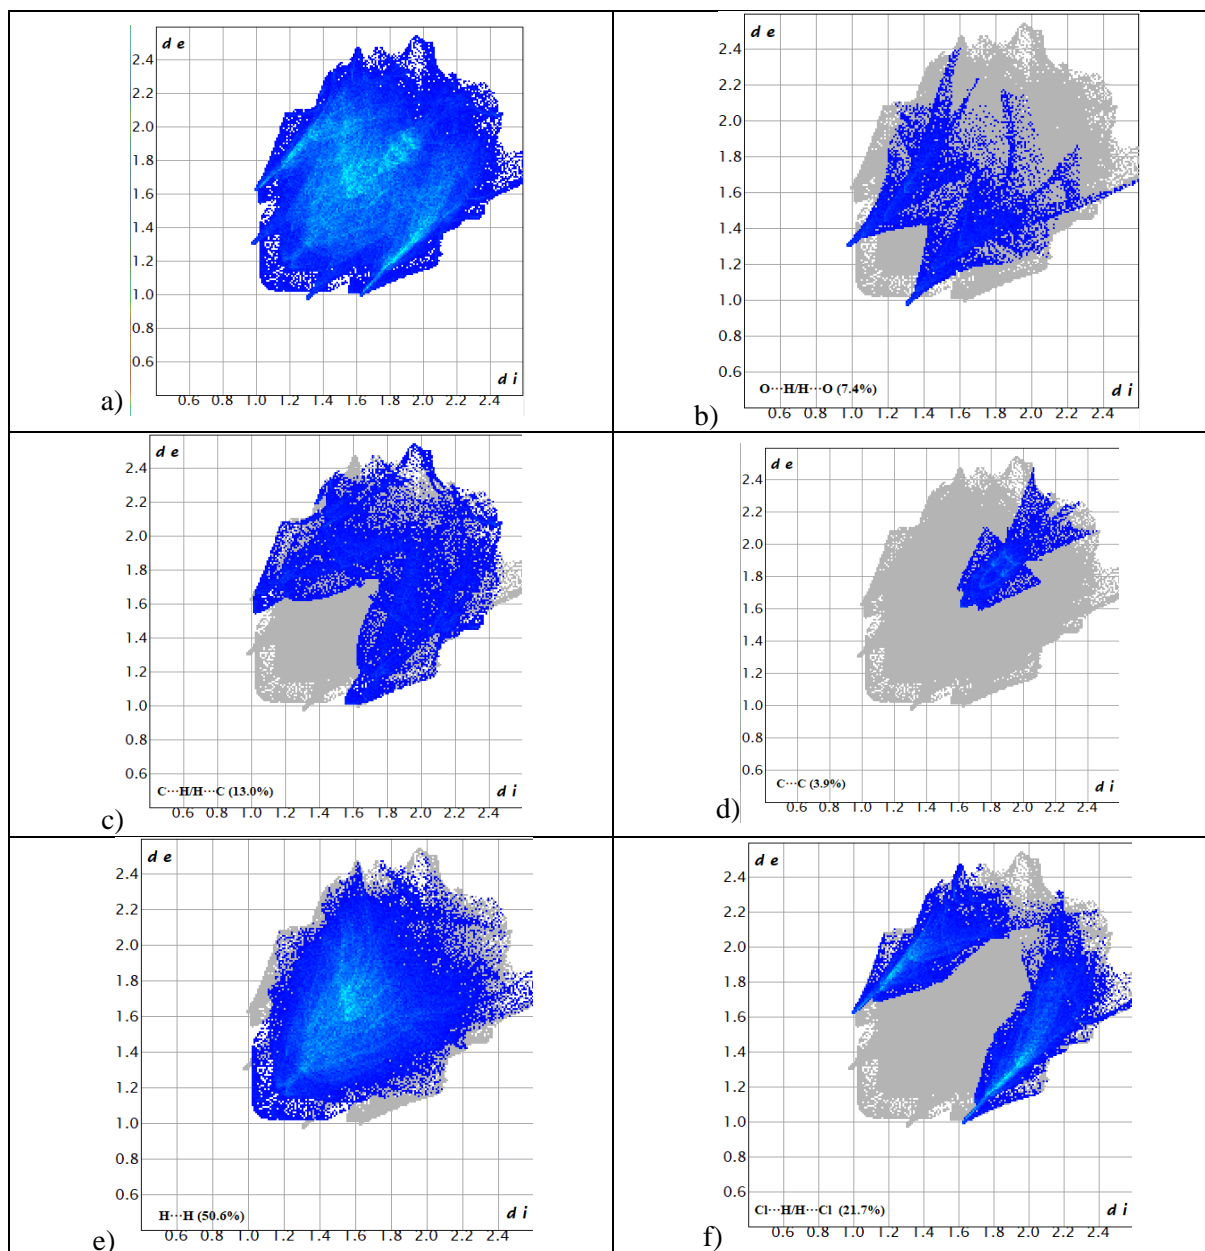

**Figure S23** The full two-dimensional fingerprint plots of HAR7 model of prepared complex, showing a) all interactions, b)  $O \cdots H/H \cdots O$ , c)  $C \cdots H/H \cdots C$ , d)  $C \cdots C$ , e)  $H \cdots H$ , and f)  $Cl \cdots H/H \cdots Cl$  close contacts.

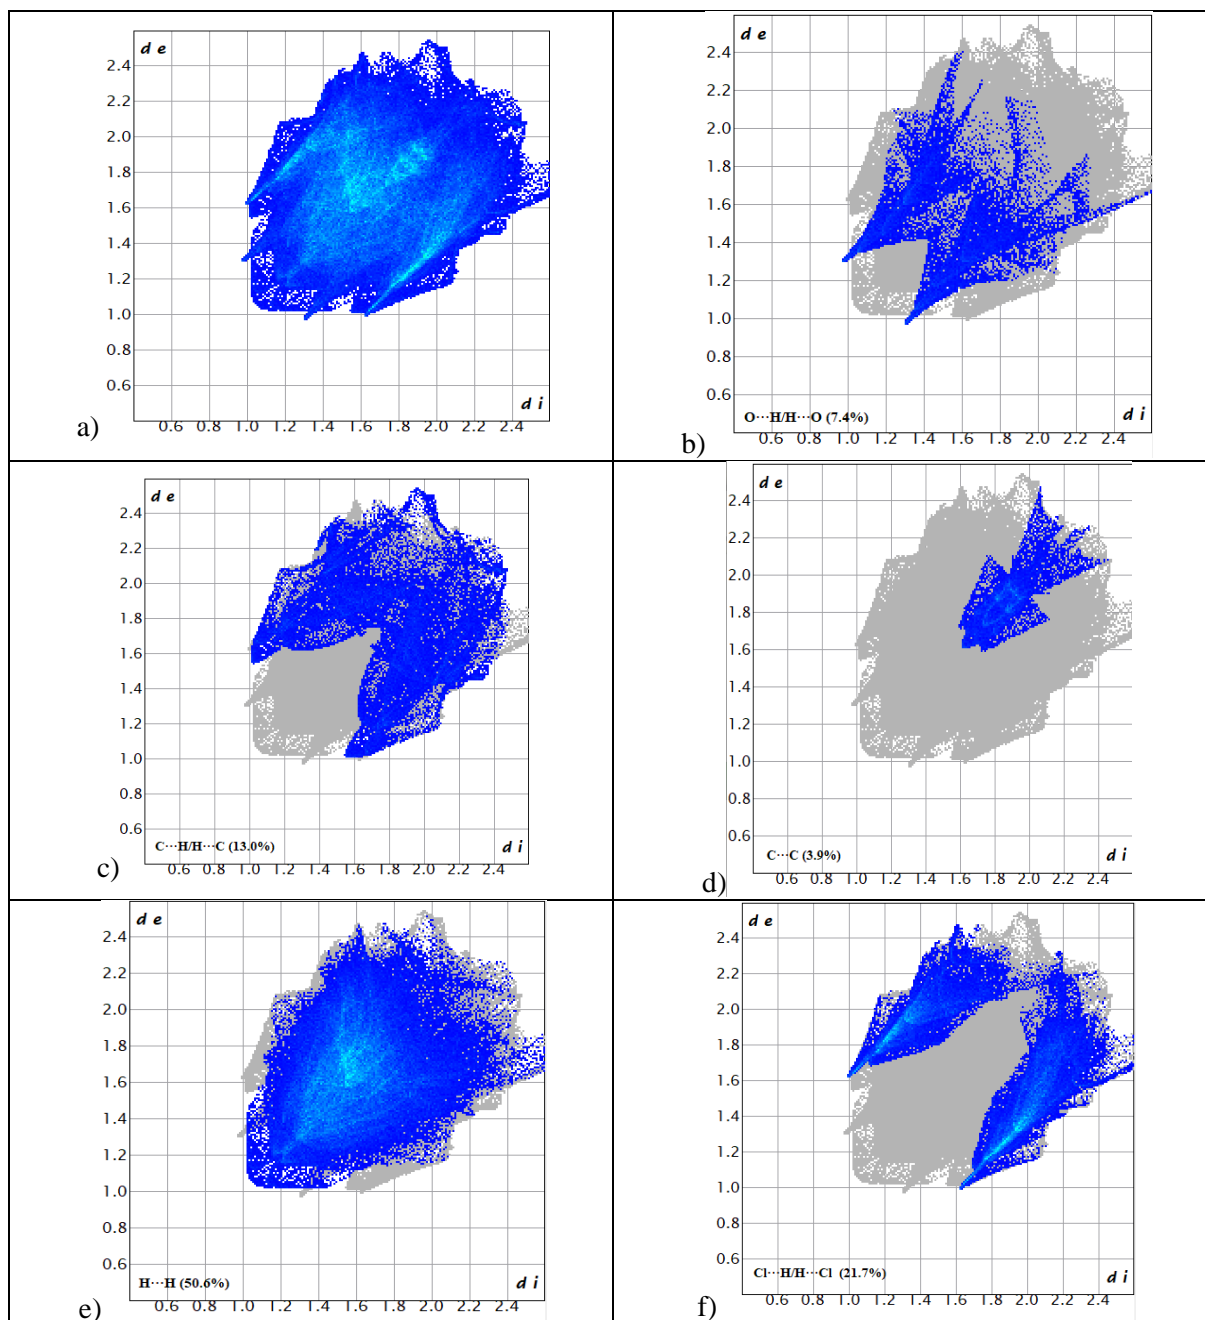

**Figure S24** The full two-dimensional fingerprint plots of HAR8 model of prepared complex, showing a) all interactions, b)  $\text{O}\cdots\text{H}/\text{H}\cdots\text{O}$ , c)  $\text{C}\cdots\text{H}/\text{H}\cdots\text{C}$ , d)  $\text{C}\cdots\text{C}$ , e)  $\text{H}\cdots\text{H}$ , and f)  $\text{Cl}\cdots\text{H}/\text{H}\cdots\text{Cl}$  close contacts.



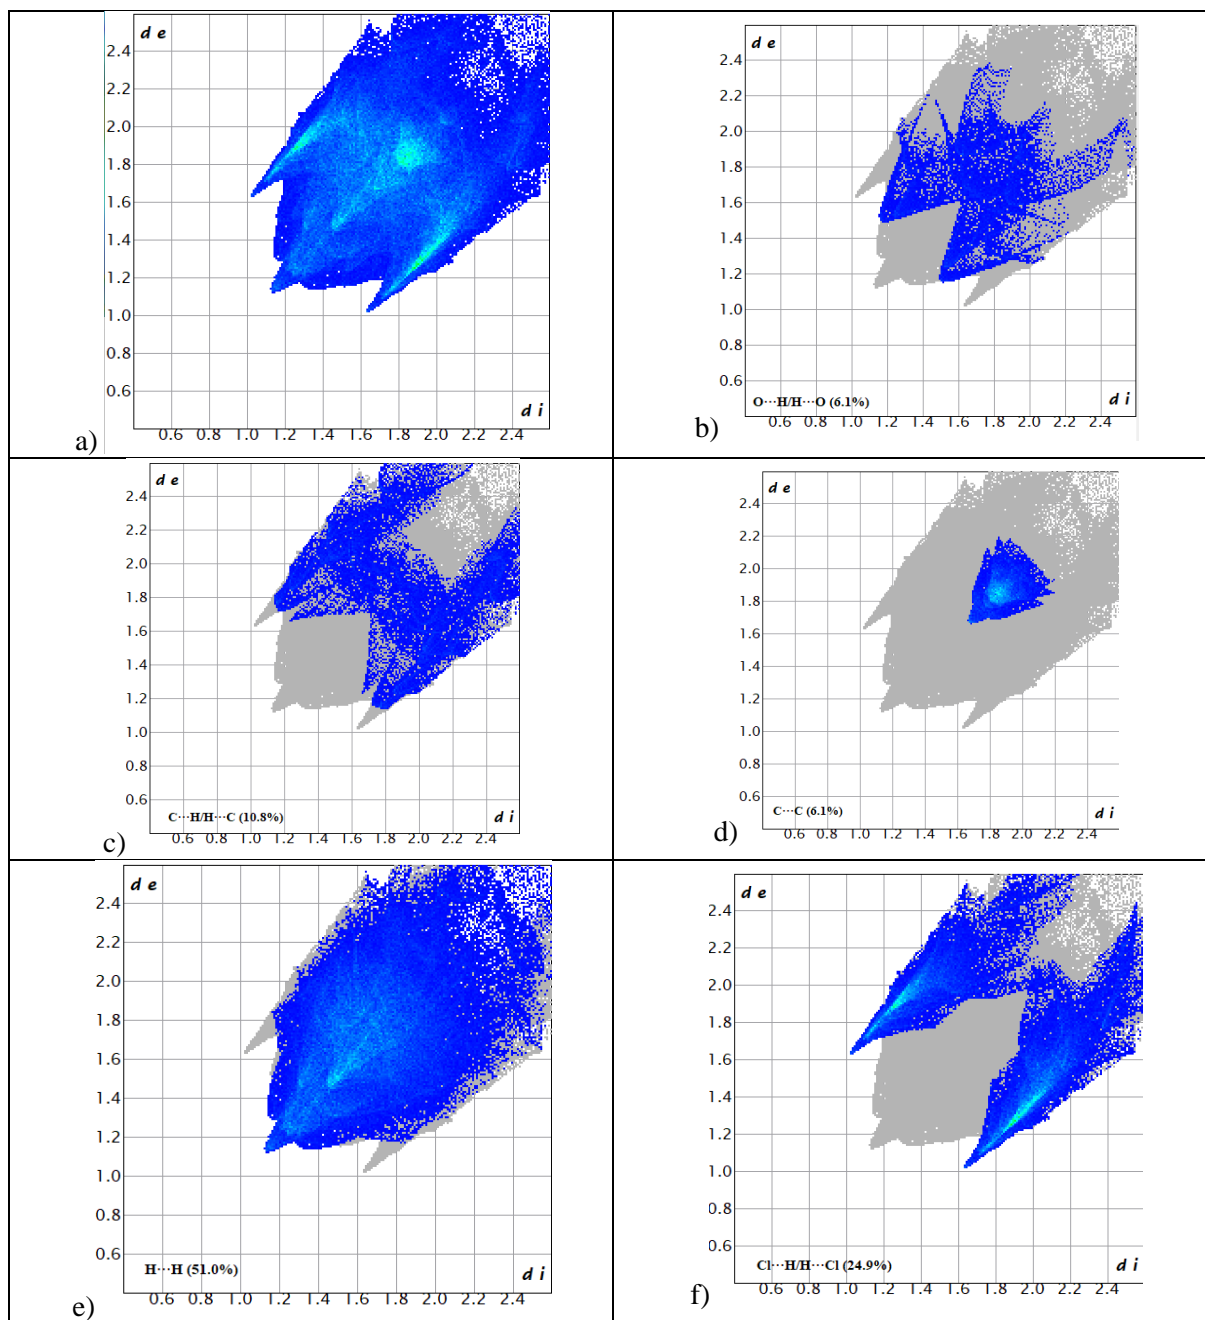

**Figure S25** The full two-dimensional fingerprint plots of orthorhombic polymorph [35], showing a) all interactions, b)  $O \cdots H/H \cdots O$ , c)  $C \cdots H/H \cdots C$ , d)  $C \cdots C$ , e)  $H \cdots H$ , and f)  $Cl \cdots H/H \cdots Cl$  close contacts.

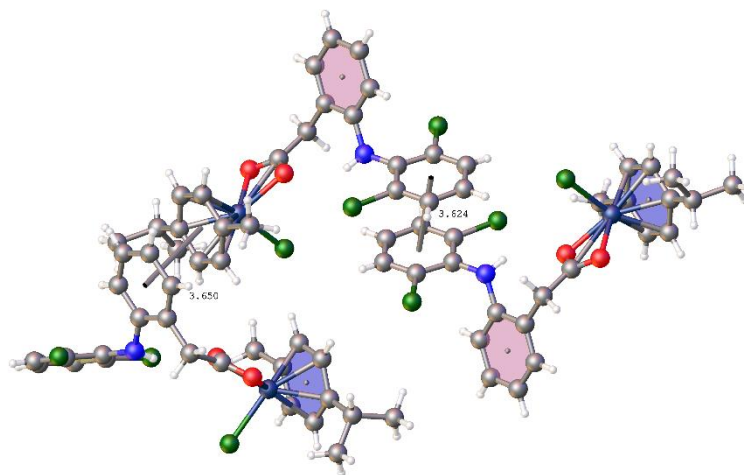

**Figure S26**  $\pi$ - $\pi$  interactions in a polymorph that was previously published [35].

## References

35. P. Mandal, B.K. Kundu, K. Vyas, V. Sabu, A. Helen, S.S. Dhankhar, C.M. Nagaraja, D. Bhattacharjee, K.P. Bhabak, S. Mukhopadhyay, Ruthenium(II) Arene NSAID Complexes: Inhibition of Cyclooxygenase and Antiproliferative Activity Against Cancer Cell Lines, Dalton Trans. 2018, 47, 517-527. <https://doi.org/10.1039/C7DT03637J>
