# Supplementary material for: Synthesis, Crystal Structure, Hirshfeld Surfaces Analysis, Interaction with DNA and Comparation of Different Bases in Hirshfeld Atom Refinement of New Polymorph of Chlorido(η6-p-cymene)(diclofenac)Ruthenium(II) Organometallic Compound
Source: MDPI journal article supplement (doi:10.3390/inorganics11050190), 2023-04-27
Supplement: s1 [file s1]

Archive with 1 entries (1 files):
- inorganics-2311267-supplementary.pdf
